# Supplementary material
Source: PubMed Central journal article supplement (PMC4867125)
Supplement: NIHMS773755-supplement-308648DR1_Online_Supplement.pdf [file NIHMS773755-supplement-308648DR1_Online_Supplement.pdf]

## Supplemental Materials

### Online Supplemental Methods

#### Mice

C57BL/6 and *Apoe*<sup>-/-</sup> mice were obtained from Jackson Labs. *Ccr5*<sup>-/-</sup>*Apoe*<sup>-/-</sup> mice were provided by Dr. Weber Christian (Institute for Cardiovascular Prevention, Ludwig-Maximilians-University Munich, 80336 Munich, Germany). *CD45.1Apoe*<sup>-/-</sup> and *dsRed Apoe*<sup>-/-</sup> mice were generated by cross breeding *Apoe*<sup>-/-</sup> mice with *CD45.1* mice or *dsRed* mice (all purchased from Jackson Labs). *FoxP3GFP**Apoe*<sup>-/-</sup> mice were provided by Dr. Catherine Hedrick (La Jolla Institute, USA). All mice were on a C57BL/6 background. At 8 weeks of age, female and male *Apoe*<sup>-/-</sup> and B6 mice were fed with WD (TD.88137, Harlan). After 12 weeks to 20 weeks of WD feeding, the mice were used for flow cytometry. Mice were kept in an AAALAC-approved barrier facility under specific pathogen-free conditions. All mice were genotyped using standard PCR protocols (Transnetyx).

#### Aortic single-cell preparation

Mice were sacrificed by CO<sub>2</sub>, and aortas were perfused with PBS containing heparin (20 U/ml). Aortas or carotid arteries were isolated by removal of all adventitial fat or surrounding muscles, cut into small pieces, and incubated for 50 to 60 minutes at 37°C with gentle shaking in a mixture of 237 U/ml collagenase type I, 190 U/ml collagenase type XI, 120 U/ml hyaluronidase, and 120 U/ml DNase I (all enzymes from Sigma-Aldrich) in HBSS.

#### Flow cytometry analysis

Cell suspensions were filtered through 70-µm cell strainers and stained with anti-mouse CD45-PerCP (clone 30-F11; BD Biosciences), anti-mouse TCRβ Alexa Fluor 700 (clone H57-597; Biolegend), anti-mouse CD8 APC-Cy7 (clone 53-6.7; Biolegend), anti-mouse FoxP3 eF450 (clone FJK-16s ; eBioscience), antimouse IFN-γ PE-Cy7 (clone XMG1.2; BD Bioscience), anti-mouse T-bet APC (clone 4B10; Biolegend), anti-mouse CD25 APC (clone PC61.5; eBioscience), anti-mouse CD44 eF450 (clone IM7; eBioscience), anti-mouse CD62L PE-Cy7 (clone MEL-14; Biolegend), anti-mouse CCR5 PE (clone HM-CCR5; Biolegend), anti-mouse CXCR3 PE-Cy7 (clone CXCR3-173; Biolegend), anti-mouse CCR6 FITC (clone 221002; R&D) and LIVE/DEAD® Fixable Aqua Dead Cell Stain Kit (Life Technologies). For intracellular staining, FoxP3 staining buffer set (eBioscience) was used.

#### Quantification of atherosclerosis, histology and immunofluorescence

Isolated whole aortas were fix with 4% PFA and stained with Sudan IV. Digital images were obtained and analyzed by ImageJ to calculate the percentage of plaque area per aorta. Aortic roots were frozen in OCT compound on dry ice and stored at -80°C. 5-µm sections were taken in the aortic valve plane. Frozen sections were thawed and fixed for 10 minutes in isopropanol on ice. Sections were blocked by 10% normal goat serum (Sigma, G9023-10ML) for 1 hour at room temperature and then stained by rat anti-mouse CCR5-FITC (clone: HEK/1/85a; abcam) and rabbit anti-mouse CD3 (clone: ab5690; abcam), or by rabbit anti-mouse CCL5 (clone R6G9; eBioscience) and rat anti-mouse CD31-APC (clone MEC 13.3; BD Bioscience) over night followed by staining with secondary antibody: anti-FITC Alexa Fluor 488 (Molecular Probes) and anti-rabbit IgG Alexa Fluor 650 (Abcam) or by anti-rabbit IgG Alexa Fluor 568 (Invitrogen). Images were acquired on a Leica DM6000 upright microscope using HCX PLAPO ×20 and ×40 oil-immersion objectives. Co-localization of fluorescence signal from CCR5 and CD3 was analyzed by ImageJ. In order to analyze co-localization, background was subtracted from the CD3 and CCR5 channels. Then a CD3 mask channel showing only CD3 positive cells was created. Based on the mask a new CD3 and CCR5 channels which contained signal only within the masked area was created.

### Cell sorting

For in vitro T cell homing assay, lymphocytes harvested from spleen were purified by RoboSep CD4 T cell negative selection (StemCell Technology). The effector (CD4<sup>+</sup>CD25<sup>-</sup>CD44<sup>hi</sup>CD62L<sup>-</sup>) and naïve (CD4<sup>+</sup>CD25<sup>-</sup>CD44<sup>lo</sup>CD62L<sup>+</sup>) T cells were stained with anti-mouse CD4 PE (clone rm4-5; Biolegend), anti-mouse CD25 APC (clone PC61.5; eBioscience), anti-mouse CD44 eF450 (clone IM7; eBioscience) and anti-mouse CD62L PE-Cy7 (clone MEL-14; Biolegend) and then sorted on FACS Aria (BD Bioscience).

### 2 photon imaging

2-photon imaging was performed using a DM 6000 upright microscope with 4 nondescanned detectors (Leica Microsystems) and a Chameleon Ultra Ti: Sapphire laser (Coherent) tuned at 900–1,000 nm for acquisition using a water-dipping objective (Olympus XLUMPLFL 20XW, NA0.95). Emitted fluorescence was split with 2 dichroic mirrors (560 nm and 593 nm) and passed through filters (Semrock) at 535/22 nm, 585/40 nm, and 624/40 nm. Typically, 10–20 z planes spaced 10–15 µm apart were acquired at 512 × 512 pixels every 1 minute. Images were smoothed by median filtering at kernel size 3 × 3 pixels. 3D reconstructions of aortas were performed using Imaris software (version 7.1.1 ×64; Bitplane AG) after stitching several z series encompassing the artery using XuvTools software.

### Treg suppression assay

To analyze CCR5Teff cell function, we performed a suppression assay with T cells derived from the para-aortic LNs of *FoxP3GFP**Apoe*<sup>-/-</sup> mice on WD >5 month. Splenic CellTrace Violet labeled CD4<sup>+</sup>CD25<sup>-</sup> (1×10<sup>4</sup>) T cells isolated from *Apoe*<sup>-/-</sup> mice on CD were cultured with a-CD3 mAb (1µg/ml) in the presence of 5×10<sup>4</sup> irradiated (3000 Gy) T-depleted splenic APCs and decreasing amounts of CD4<sup>+</sup>CCR5<sup>+</sup> cells or CD4<sup>+</sup>CCR5<sup>-</sup>GFP<sup>+</sup> conventional Tregs (at indicated ratio) sorted from para-aortic LNs of *Apoe*<sup>-/-</sup>*Foxp3GFP* mice on WD > 5 mth. CellTrace Violet labeled CD4<sup>+</sup>CD25<sup>-</sup> T cells were also cultured with CD4<sup>+</sup>CD25<sup>+</sup> splenic conventional Tregs from *Apoe*<sup>-/-</sup>CD mice or without Tregs as controls. After 4 days of culture in complete RPMI 1640 medium containing 10% FBS, penicillin/streptomycin, l-glutamine, NEAA, HEPES, and sodium pyruvate in 96-well round-bottom plates at 37°C and 5% CO<sub>2</sub> in a humidified incubator, proliferation was measured by CellTrace Violet signal using flow cytometry, and supernatant was collected to measure cytokine secretion by mouse Th1/Th2/Th17 cytometric bead array (BD Biosciences).

### In vivo T cell functional assay

CCR5Teff (CD4<sup>+</sup>CD25<sup>-</sup>CCR5<sup>+</sup>) were sorted from the paLNs of *Cd45.1 Apoe*<sup>-/-</sup> mice on WD for > 5 months. 2×10<sup>5</sup> CCR5Teff cells or saline were injected retro-orbitally into *Ccr5*<sup>-/-</sup>*Apoe*<sup>-/-</sup> mice on WD for 2 months. Recipient mice were continued on WD for 12 weeks and sacrificed. Whole aortas were isolated, fixed with 4% PFA and stained with Sudan IV. Plaque area was quantified by imageJ.

### Adoptive transfer

CCR5Teff (CD4<sup>+</sup>CD25<sup>-</sup>CCR5<sup>+</sup>) cells, Treg (CD4<sup>+</sup>CD25<sup>+</sup>CCR5<sup>-</sup>) and Teff (CD4<sup>+</sup>CD25<sup>-</sup>CCR5<sup>-</sup>CD44<sup>hi</sup>CD62L<sup>-</sup>) were sorted from pooled paLNs from *Cd45.1 Apoe*<sup>-/-</sup> mice on WD for 5 months. 2×10<sup>5</sup> cells or saline were injected retro-orbitally into *Ccr5*<sup>-/-</sup>*Apoe*<sup>-/-</sup> mice that have been on WD for 2 months. The recipient mice were kept on WD for 12 weeks before scarification.

### Cytokine bead array

CCR5Teff (CD4<sup>+</sup>CD25<sup>-</sup>CCR5<sup>+</sup>), Treg (CD4<sup>+</sup>CD25<sup>+</sup>) and Teff (CD4<sup>+</sup>CD25<sup>-</sup>CCR5<sup>-</sup>CD44<sup>hi</sup>CD62L<sup>lo</sup>) were sorted from pooled pALNs from 5 *Apoe*<sup>-/-</sup> on WD for 5 month. Cells were cultured in complete RPMI 1640 media containing 10% FBS, penicillin/streptomycin, l-glutamine, NEAA, HEPES, and sodium pyruvate in the presence of cell stimulation cocktail (eBioscience) over night. Supernatants were collected and cytokine secretion was measured by mouse Th1/Th2/Th17 cytometric bead array (BD Biosciences).

### RNA sequencing

CCR5Teff (CD4<sup>+</sup>CD25<sup>-</sup>CCR5<sup>+</sup>), Treg (CD4<sup>+</sup>CD25<sup>+</sup>) and Teff (CD4<sup>+</sup>CD25<sup>-</sup>CCR5<sup>-</sup>CD44<sup>hi</sup>CD62L<sup>lo</sup>) were sorted from pooled pALNs from 5 *Apoe*<sup>-/-</sup> on WD for 5 months. RNA was extracted from sorted cells using RNeasy micro kit (Qiagen). RNA quality was determined by bioanalyzer. RNA was reverse transcribed and tagged using the Nextera kit and RNA sequencing is performed on Illumina Hiseq 2500 using rapid run mode following SMARTseq II protocol from Illumina <sup>66</sup>.

**RNA sequencing data analysis.** The single-end reads that passed Illumina filters were filtered for reads aligning to tRNA, rRNA, adapter sequences, and spike-in controls. The reads were then aligned to UCSC mm9 reference genome using TopHat (v 1.4.1) <sup>67</sup>. DUST scores were calculated with PRINSEQ Lite (v 0.20.3) <sup>68</sup> and low-complexity reads (DUST > 4) were removed from the BAM files. The alignment results were parsed via the SAMtools <sup>69</sup> to generate SAM files. Read counts of each genomic feature were obtained with the htseq-count program (v 0.6.0) <sup>70</sup> using the “union” option. After removing absent features (zero counts in all samples), the raw counts were then imported to R/Bioconductor package DESeq2<sup>71</sup> to identify differentially expressed genes among samples. DESeq2 normalizes counts by dividing each column of the count table (samples) by the size factor of this column. The size factor is calculated by dividing the samples by geometric means of gene counts (nth root of the product of gene counts across samples). This normalizes the counts being averaged, so that no counts dominate the weighting. P-values for differential expression were calculated using binomial test for differences between the base means of two conditions. These p-values were then adjusted for multiple test correction using the Benjamini Hochberg algorithm<sup>72</sup> to control the false discovery rate. We considered genes differentially expressed between two groups of samples when the DESeq2 analysis resulted in an adjusted P-value of <0.01. Cluster analyses including principal component analysis (PCA) and hierarchical clustering were performed using standard algorithms and metrics. Hierarchical clustering was performed using complete linkage with Euclidean metric. The sequences and reads counts used in this article have been submitted to the Gene Expression Omnibus under accession number XXXX (<http://www.ncbi.nlm.nih.gov/geo/>).

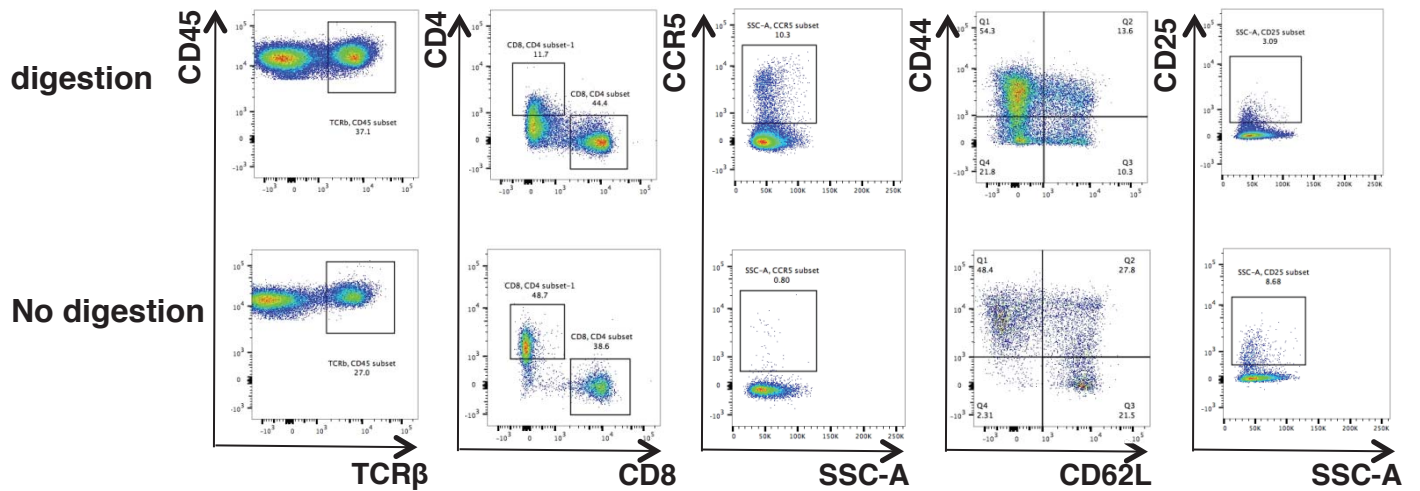

**Online Figure I. Digestion process affects surface expression of CD4, CCR5 and CD62L.** PaLNs were harvested from *ApoE*<sup>-/-</sup> mice fed on WD>5mth. Single cell suspension were split into two tubes. One was digested by enzyme cocktail as described in methods section. The other one was not digested. Cells were analyzed by multi-color flow cytometry. The populations shown in the figure are all gated on live singlets CD45<sup>+</sup> cells.

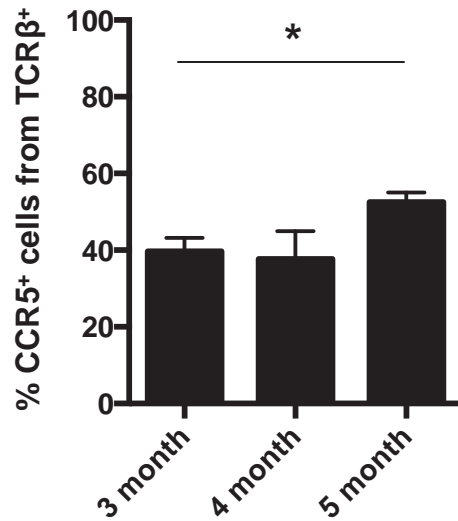

**Online Figure II. CCR5 expression on T cells peaks at 5 month on WD in the aorta of *Apoe*<sup>-/-</sup> mice.** Aortas from *Apoe*<sup>-/-</sup> WD mice (n=5 in each group) were harvested at different time point. Aortas were digested and the cells were analyzed by multi-color flow cytometry. The populations shown in the figure are gated on live CD45<sup>+</sup>TCRb<sup>+</sup>CD11b<sup>-</sup> T cells. Gatings are set based on FMO controls and isotype controls. Values are mean ±SE. \* p<0.05 5month vs. 3 month, n=5, T-Test.

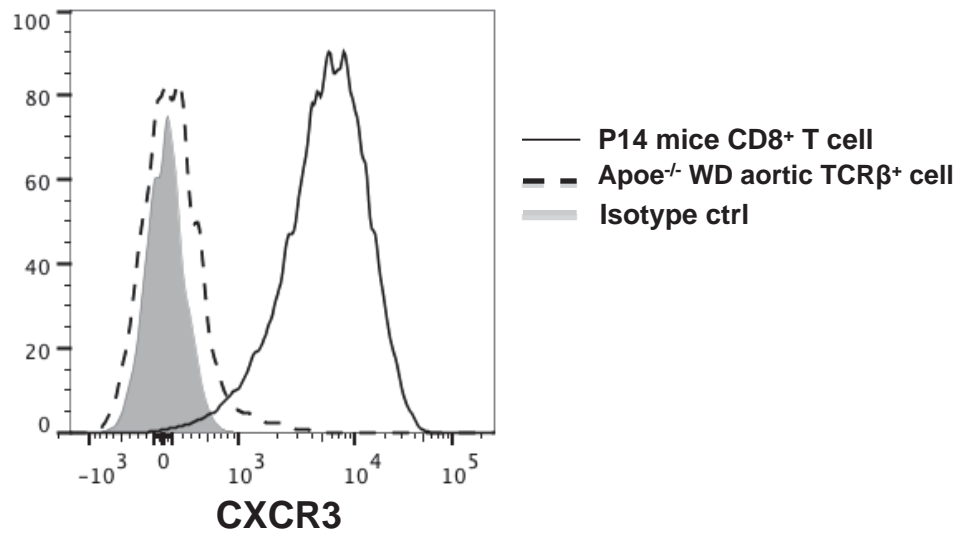

**Online Figure III. CD8<sup>+</sup> T cells from P14 mice stimulated *in vitro* express CXCR3.** CD8<sup>+</sup> T cells from p14 mice (transgenic mice of which the T cells recognize a peptide derived from lymphocytic choriomeningitis virus) were cultured *in vitro* with 10 U/ml rhIL2 for 6 days. Single cells suspension were stained by CXCR3 antibody or isotype antibody. Aortic single cell suspension from Apoe<sup>-/-</sup> WD mice was stained with the same CXCR3 antibody. The stained cells were analyzed by multi-color flow cytometry.

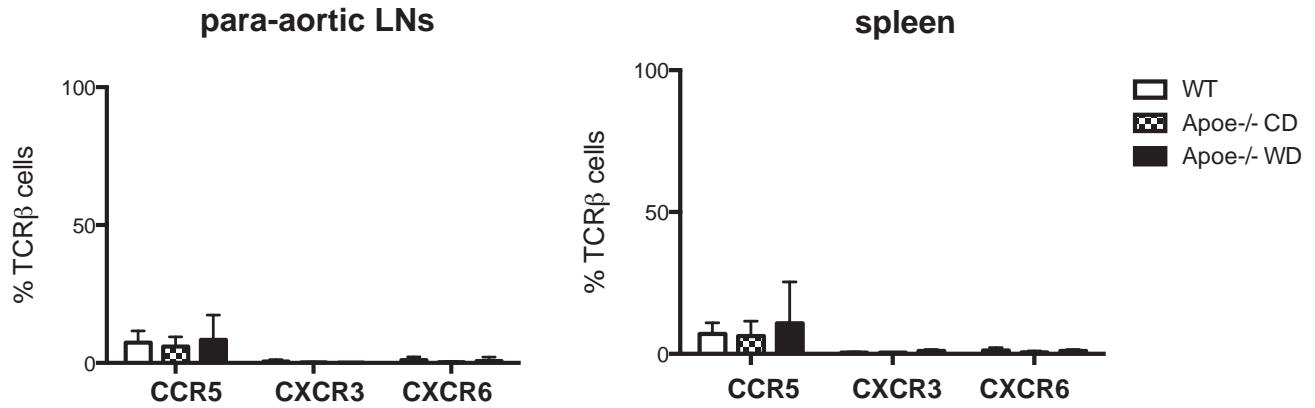

**Online Figure IV. CCR5 or CXCR6 expression on T cells is not increased in the paLNs or spleen of *Apoe*<sup>-/-</sup> WD mice.** paLNs and spleens from *Apoe*<sup>-/-</sup> WD mice, *Apoe*<sup>-/-</sup> CD mice and C56BL/6 WT mice (n=5 in each group) were harvested and the cells were analyzed by multi-color flow cytometry. The populations shown in the figure are gated on live CD45<sup>+</sup>TCRb<sup>+</sup>CD11b<sup>-</sup> T cells. Gatings are set based on FMO controls and isotype controls. Values are mean±SD. \* p<0.05 T-Test.

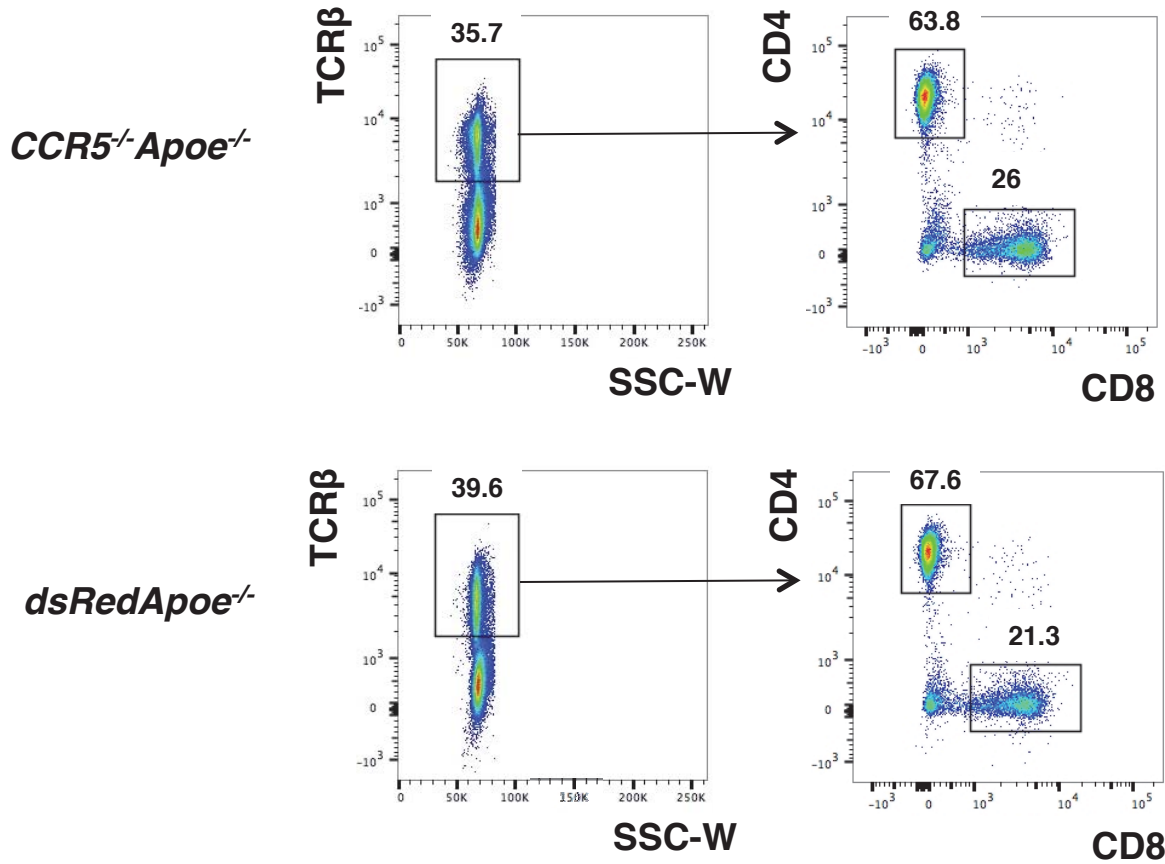

Online Figure V. Splenic T cell populations in *CCR5<sup>-/-</sup>Apoe<sup>-/-</sup>* mice are similar to *dsRedApoe<sup>-/-</sup>* mice. Splenocytes from *CCR5<sup>-/-</sup>Apoe<sup>-/-</sup>* and *dsRedApoe<sup>-/-</sup>* mice fed on WD for 5 months were analyzed by flow cytometry. The populations shown are gated on live singlets CD45<sup>+</sup> cells.



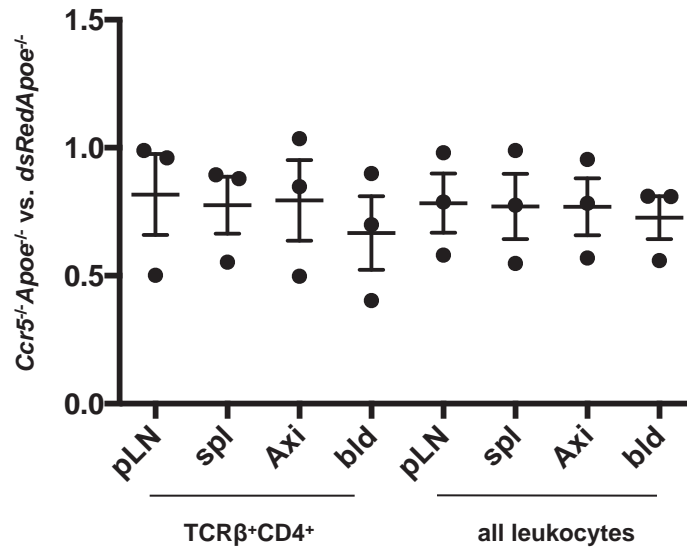

**Online Figure VI. CCR5 deficient T cells efficiently homing to the lymphoid organs and blood in *Apoe*<sup>-/-</sup> WD mice.** Totally  $60 \times 10^6$  splenocytes from *dsRedApoe*<sup>-/-</sup> mouse and *Ccr5*<sup>-/-</sup> *Apoe*<sup>-/-</sup> mouse at 1:1 ratio were adoptively transferred to *CD45.1Apoe*<sup>-/-</sup> WD mouse by retro-orbital injection. 24 hrs after transfer, the recipient mouse was sacrificed. Para-aortic LNs (pLN), spleen (spl), axillary LN (Axi) and blood (bld) were harvested and the cells were analyzed by flow cytometry. CD45.2 cells were gated from live, singlets, CD45.2<sup>+</sup>CD45.1<sup>-</sup>. The percentage of transferred TCRβ<sup>+</sup>CD4<sup>+</sup> T cells and all CD45.2 leukocytes is normalized by its percentage in the input. Data shown is the fold change of *Ccr5*<sup>-/-</sup> *Apoe*<sup>-/-</sup> vs. *dsRedApoe*<sup>-/-</sup>. \*  $p < 0.05$ , t-test.

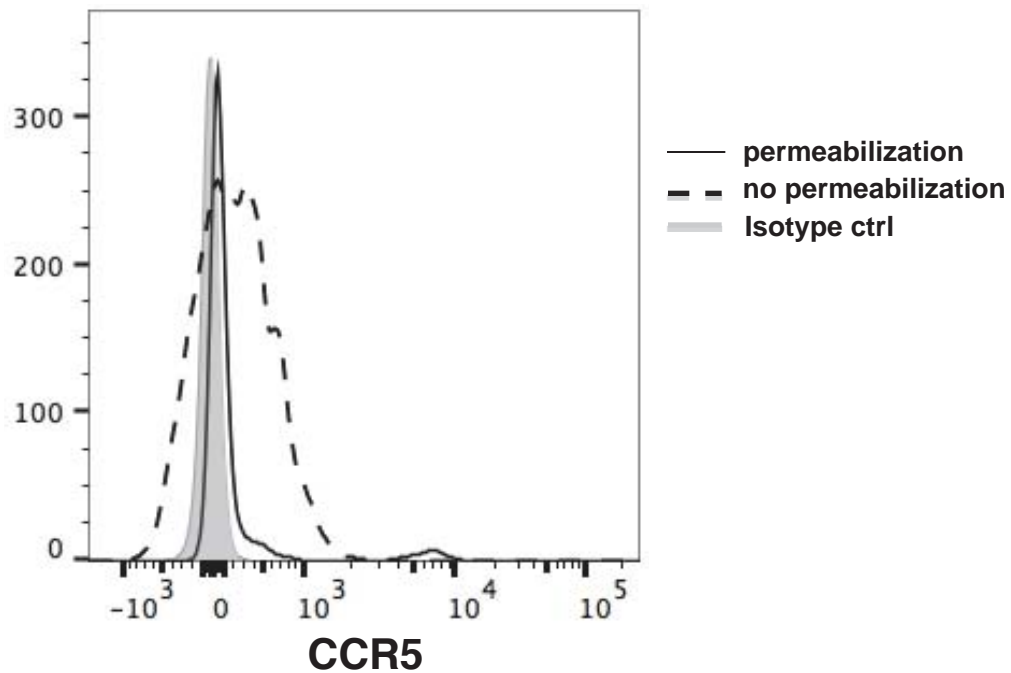

**Online Figure VII . Permeabilization decreases CCR5 staining on T cells in the aorta of *Apoe*<sup>-/-</sup> mice on WD for 5.** Aortas were harvested from *Apoe*<sup>-/-</sup> mice fed on WD for 5mth and digested as described in methods. Single cell suspension were stained with antibodies against surface antigens including CCR5 and followed by permeabilization or not. Cells were analyzed by multi-color flow cytometry. The populations shown in the figure are all gated on live singlets CD45<sup>+</sup> TCR $\beta$ <sup>+</sup> cells.

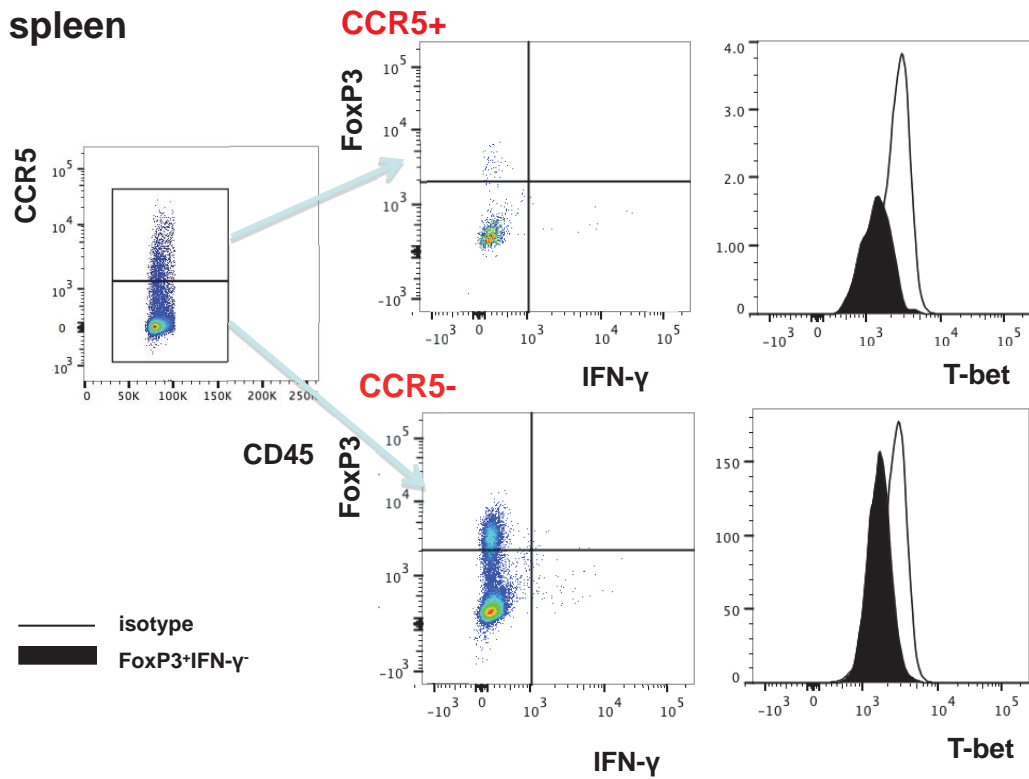

**Online Figure VIII. CCR5Teff cells are not present in the spleen of *Apoe*<sup>-/-</sup> WD mice.** Spleens were harvested from *Apoe*<sup>-/-</sup> WD mice. Single cell suspension from spleen were analyzed by multi-color flow cytometry. The populations shown in the figure are all gated on live CD45<sup>+</sup> siglets TCR $\beta$ <sup>+</sup> T cells. Gatings are set based on FMO controls and isotype controls. One representative experiment is shown.

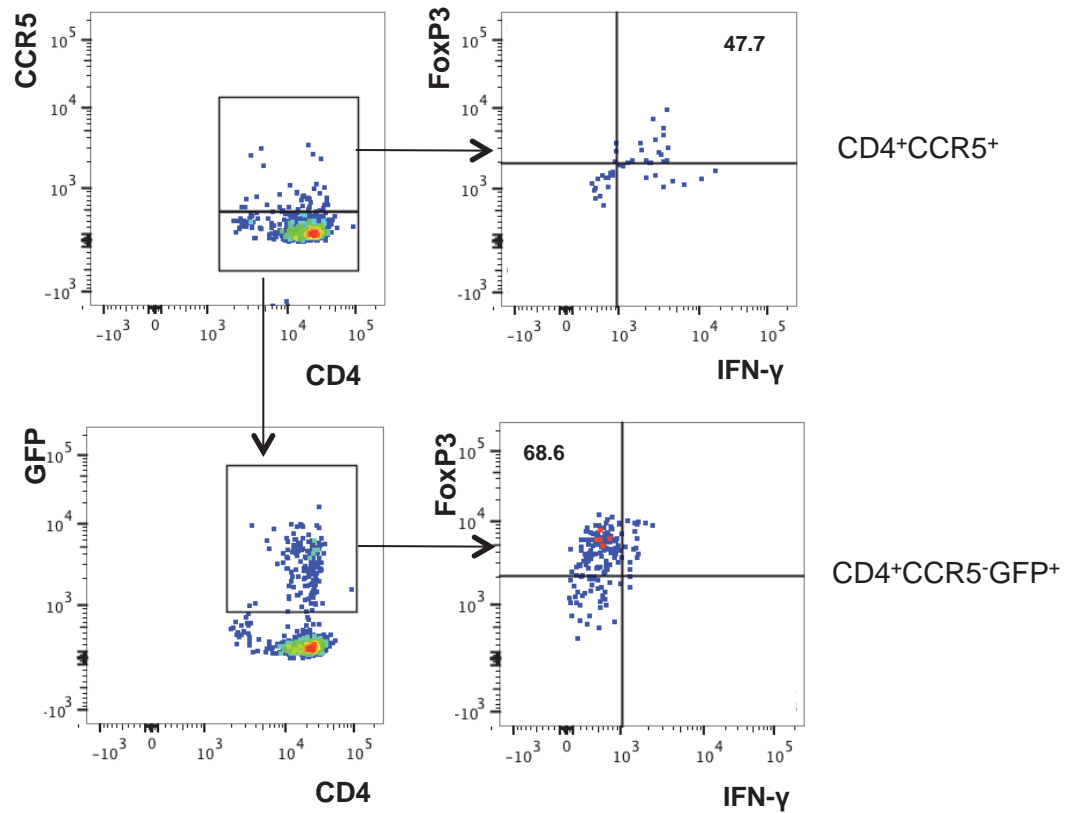

**Online Figure IX. Conventional Tregs and FoxP3<sup>+</sup>IFN-γ<sup>+</sup> cells from the paLNs of *FoxP3GFP<sup>Apoe</sup><sup>-/-</sup>* WD mice.** PaLNs were harvested from *FoxP3GFP<sup>Apoe</sup><sup>-/-</sup>* mice on WD>5mth. Single cell suspension from paLNs were analyzed by multi-color flow cytometry. The populations shown in the figure are all gated on live singlets CD45<sup>+</sup> CD4<sup>+</sup> T cells. Cells from CD4<sup>+</sup>CCR5<sup>+</sup> are mostly FoxP3<sup>+</sup>IFN-γ<sup>+</sup> cells. Cells from CD4<sup>+</sup>CCR5<sup>-</sup>GFP<sup>+</sup> are mostly FoxP3<sup>+</sup>IFN-γ<sup>-</sup> conventional Tregs.

**ApoE<sup>-/-</sup> WD**

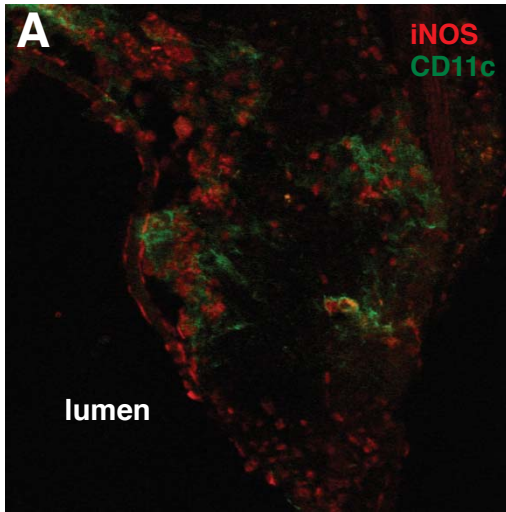

**ApoE<sup>-/-</sup> WD**

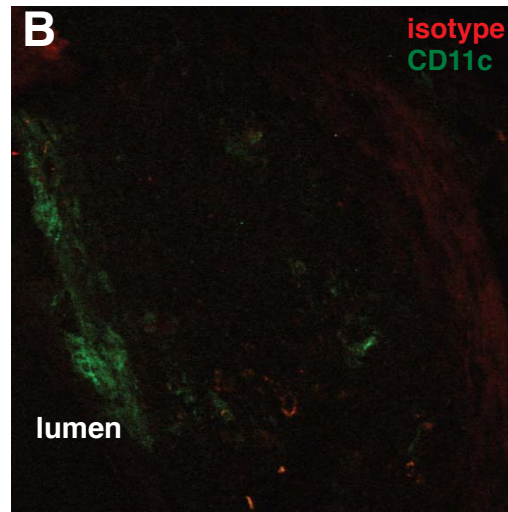

**CD4<sup>+</sup>CCR5<sup>+</sup> → Ccr5<sup>-/-</sup> ApoE<sup>-/-</sup>**

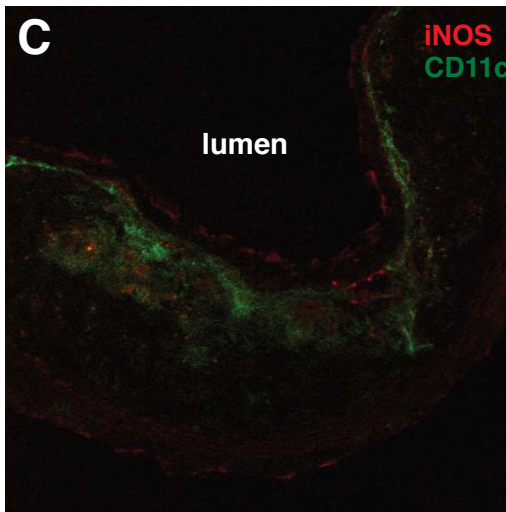

**Saline → Ccr5<sup>-/-</sup> ApoE<sup>-/-</sup>**

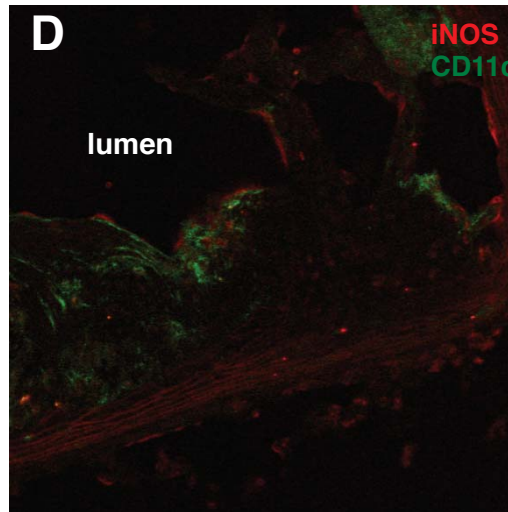

**E**

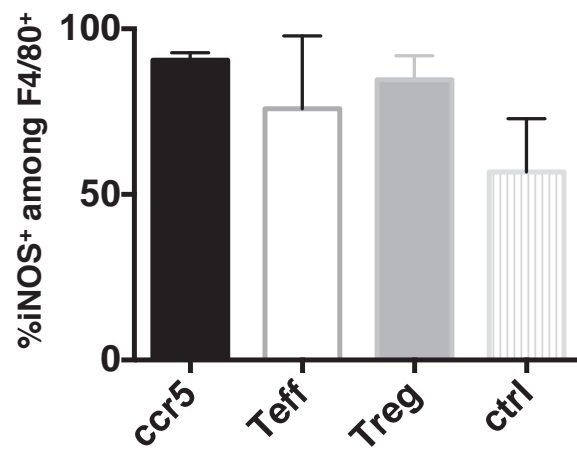

**Online Figure X. CCR5<sup>+</sup>CD4<sup>+</sup> T cells do not increase iNOS in the aorta of *Apoe*<sup>-/-</sup> mice.** Fresh frozen aortic root sections from **A** and **B**, *Apoe*<sup>-/-</sup> WD mice **C**, *Ccr5*<sup>-/-</sup>*Apoe*<sup>-/-</sup> mice that transferred with 2x10<sup>5</sup> CCR5<sup>+</sup>CD4<sup>+</sup> T cells or **D**, saline from Figure 7 were fixed and stained with fluorescently labeled antibodies against iNOS (red) and CD11c (green). **E**, 2 x 10<sup>5</sup> CCR5<sup>+</sup>Teff (CD4<sup>+</sup>CCR5<sup>+</sup>), Treg (CD4<sup>+</sup>CCR5<sup>-</sup>CD25<sup>+</sup>), or Teff (CD4<sup>+</sup>CCR5<sup>-</sup>CD25<sup>-</sup>CD44<sup>hi</sup>CD62L<sup>-</sup>) sorted from paLNs were cultured with explanted aorta from *Apoe*<sup>-/-</sup> CD mice over night. iNOS<sup>+</sup> from F4/80<sup>+</sup> cells were quantified by flow cytometry. Cells were gated on CD45<sup>+</sup>live singlets F4/80<sup>+</sup> iNOS<sup>+</sup>. n=5.

## Online Table

### CCR5Teff vs. Teff

| Gene        | log2FoldChange | p value  |
|-------------|----------------|----------|
| Satb1       | 2.46           | 5.00E-14 |
| Ccr7        | 1.79           | 7.90E-10 |
| Ggt5        | 2.05           | 1.50E-08 |
| Sell        | 1.9            | 8.50E-08 |
| Gm14085     | 1.83           | 7.10E-06 |
| Ampd1       | 1.75           | 1.50E-05 |
| 2610019F03f | 1.51           | 0.00027  |
| Pdlim4      | 1.6            | 0.00034  |
| Trem12      | 1.45           | 0.001    |
| Adh1        | 1.45           | 0.003    |
| Cyp2d22     | 1.42           | 0.0044   |
| Slc16a5     | 1.38           | 0.0062   |
| Gpr146      | 1.29           | 0.0068   |
| Tet1        | 1.29           | 0.0089   |
| Ncr1        | 1.26           | 0.0092   |
| Gm11346     | 1.09           | 0.0097   |
| Als2cl      | 1.16           | 0.013    |
| Pole2       | 1.27           | 0.016    |
| Gabrr2      | 1.25           | 0.02     |
| Ly6c1       | 1.12           | 0.023    |
| Actn1       | 1.19           | 0.042    |
| Fbxo17      | 1.06           | 0.05     |
| Nedd4l      | 1.18           | 0.05     |

### CCR5Teff vs. Treg

| Gene       | log2FoldChange | p value  |
|------------|----------------|----------|
| Gbp1       | -4.36          | 2.70E-34 |
| Foxp3      | -3             | 6.60E-29 |
| Pltp       | 3.88           | 2.10E-23 |
| Gata1      | -2.83          | 2.10E-20 |
| Klrg1      | -2.94          | 5.90E-18 |
| Padi4      | 3.38           | 6.50E-18 |
| Gpm6b      | 2.44           | 1.40E-17 |
| Gsta4      | -3.2           | 3.00E-17 |
| Lair1      | 2.87           | 5.30E-17 |
| Ascl2      | 3.6            | 1.00E-16 |
| Gbp3       | -2.07          | 5.90E-16 |
| Gm4956     | -3.19          | 1.90E-14 |
| Slc16a5    | 2.33           | 2.30E-13 |
| 2210020M01 | 3.59           | 3.90E-13 |
| Socs2      | -2.83          | 4.80E-13 |
| Matn2      | -2.3           | 4.90E-13 |
| Itgae      | -2.49          | 9.00E-13 |
| Clec12a    | 3.42           | 2.80E-12 |
| Capn3      | -2.08          | 2.90E-12 |
| Gal        | 3.34           | 1.00E-11 |
| Ly6c2      | 2.92           | 1.40E-11 |
| Ccl5       | 2.75           | 1.50E-11 |
| Slc35d1    | -2.36          | 1.90E-11 |
| Fgl2       | -2.33          | 2.00E-11 |
| Igf2r      | -2.14          | 2.10E-11 |
| Pld4       | 2.82           | 2.10E-11 |
| Anxa2      | 2.16           | 2.70E-11 |
| Gpr34      | -2.37          | 6.30E-11 |
| Eno3       | -2.37          | 1.00E-10 |
| Slc2a3     | -2.17          | 1.00E-10 |
| Ifngr1     | -1.78          | 1.60E-10 |
| Atp1a3     | 2.81           | 2.80E-10 |
| Dnahc7b    | -3.09          | 8.80E-10 |
| Syp        | -2.69          | 9.40E-10 |
| Themis     | 2.11           | 2.50E-09 |
| Klra17     | 3.08           | 3.20E-09 |
| Cd163l1    | -3.07          | 4.20E-09 |
| Angptl2    | 2.03           | 4.40E-09 |
| Rgs1       | -1.76          | 5.30E-09 |
| Slc26a11   | 1.99           | 5.40E-09 |
| Esm1       | 2.92           | 5.40E-09 |
| Rnase6     | 2.46           | 5.40E-09 |
| Epcam      | -2.14          | 1.10E-08 |
| Paqr5      | 3              | 1.20E-08 |
| Alox5ap    | 2.84           | 1.20E-08 |

**CCR5Teff vs. Teff**

| Gene | log2FoldChange | p value |
|------|----------------|---------|
|------|----------------|---------|

**CCR5Teff vs. Treg**

| Gene | log2FoldChange | p value |
|------|----------------|---------|
|------|----------------|---------|

|            |       |          |
|------------|-------|----------|
| Cxzc5      | 2.26  | 1.50E-08 |
| Syt13      | 2.18  | 2.20E-08 |
| Gpr15      | -2.05 | 2.30E-08 |
| Laptm4b    | -2.17 | 2.80E-08 |
| Ift80      | -1.74 | 4.00E-08 |
| Kmo        | 2.56  | 4.20E-08 |
| C3         | 2.56  | 4.20E-08 |
| C630004H02 | 1.74  | 4.20E-08 |
| Phtf2      | -1.53 | 4.20E-08 |
| Tyrobp     | 2.33  | 4.20E-08 |
| Cacna1d    | 2.63  | 5.60E-08 |
| Gbp10      | -1.72 | 7.10E-08 |
| Il2rb      | -1.43 | 7.90E-08 |
| Pdcd1      | 1.69  | 7.90E-08 |
| Spns3      | 2.72  | 1.40E-07 |
| Atp1b1     | 1.58  | 1.60E-07 |
| Galnt9     | 1.96  | 1.60E-07 |
| Gsn        | 1.49  | 1.70E-07 |
| BC013712   | 2.38  | 2.40E-07 |
| Xkrx       | 2.25  | 2.60E-07 |
| Cpne7      | 2.46  | 2.80E-07 |
| Il21       | 2.66  | 2.80E-07 |
| Sema4a     | 1.92  | 2.90E-07 |
| Upb1       | 2.75  | 3.10E-07 |
| Igfbp4     | 2.17  | 3.80E-07 |
| Dap        | 1.48  | 4.00E-07 |
| Gzma       | 2.51  | 4.00E-07 |
| Gbp6       | -1.41 | 4.10E-07 |
| Rnf128     | 1.92  | 4.70E-07 |
| Cd40lg     | 1.63  | 4.80E-07 |
| Ccr5       | 2.25  | 5.70E-07 |
| Abcc3      | 2.28  | 5.70E-07 |
| Pde3b      | 2.37  | 5.70E-07 |
| Ccr8       | -1.62 | 6.50E-07 |
| Cecr6      | -2.65 | 6.60E-07 |
| Smpd13b    | 2.34  | 7.50E-07 |
| Tox2       | 2.32  | 7.50E-07 |
| Prg4       | -2.06 | 7.50E-07 |
| Plekho1    | 2.28  | 8.10E-07 |
| Ispd       | 2.2   | 8.40E-07 |
| Dntt       | 2.24  | 8.60E-07 |
| H2-Q2      | 1.93  | 8.60E-07 |
| Smtn       | 2.47  | 1.10E-06 |
| Gpr83      | -1.96 | 1.20E-06 |
| Prss30     | 2.62  | 1.30E-06 |
| Tcf7       | 1.41  | 1.60E-06 |
| Evi2a      | 1.66  | 1.70E-06 |
| Serpina9   | 2.15  | 1.70E-06 |



**CCR5Teff vs. Teff**

Gene      log2FoldChange   p value

**CCR5Teff vs. Treg**

Gene      log2FoldChange   p value

|             |       |          |
|-------------|-------|----------|
| Samd3       | 1.94  | 1.90E-06 |
| Gsto1       | -1.81 | 2.50E-06 |
| Cd86        | -2.08 | 3.00E-06 |
| Csf2rb      | 2.5   | 3.10E-06 |
| Al836003    | -2.53 | 4.40E-06 |
| Dennd2d     | 1.54  | 4.80E-06 |
| A430084P05  | 2.51  | 5.00E-06 |
| Gm3002      | -1.81 | 5.10E-06 |
| Itgb1       | 1.48  | 5.10E-06 |
| Tnfsf8      | 1.73  | 5.40E-06 |
| Cd68        | 2.33  | 7.00E-06 |
| Lcn10       | -2.48 | 7.10E-06 |
| Mctp2       | 1.97  | 8.50E-06 |
| Ppic        | 1.86  | 8.70E-06 |
| Hs3st1      | 2.37  | 9.40E-06 |
| Hpcal1      | 1.46  | 9.40E-06 |
| Mcoln2      | 1.94  | 1.10E-05 |
| Slc22a2     | -2.42 | 1.20E-05 |
| Cd300c      | 2.42  | 1.30E-05 |
| Smap2       | 1.41  | 1.30E-05 |
| 6330406I15R | -2.41 | 1.40E-05 |
| Myo1e       | -1.34 | 1.40E-05 |
| Susd2       | 1.62  | 2.00E-05 |
| Ceacam1     | 2.38  | 2.00E-05 |
| Ehd3        | 1.21  | 2.20E-05 |
| Ikzf4       | -1.61 | 2.20E-05 |
| Rcn1        | -1.42 | 2.40E-05 |
| Mettl9      | 1.56  | 2.40E-05 |
| Epha3       | 2.36  | 2.60E-05 |
| Sccpdh      | 1.71  | 2.80E-05 |
| Slc22a5     | -1.41 | 2.90E-05 |
| 1190002H23  | 1.56  | 3.00E-05 |
| Lypd6b      | 2.15  | 2.90E-05 |
| 2610019F03f | 1.89  | 3.30E-05 |
| Tnc         | 2.32  | 3.40E-05 |
| Lefty1      | 2.33  | 3.50E-05 |
| Lyst        | 1.84  | 3.80E-05 |
| Coro2b      | 1.78  | 3.90E-05 |
| Ctla4       | -1.28 | 3.90E-05 |
| St6galnac1  | 2.29  | 4.70E-05 |
| Ctsh        | 1.98  | 5.30E-05 |
| Als2cl      | 1.5   | 6.60E-05 |
| Slamf9      | 2.27  | 6.70E-05 |
| Tmie        | 1.49  | 6.90E-05 |
| Myc         | -1.13 | 7.20E-05 |
| Csgalnact1  | 1.78  | 7.80E-05 |
| Cd300lf     | 2.13  | 8.30E-05 |
| Kcnk1       | -2.24 | 8.00E-05 |

**CCR5Teff vs. Teff**

Gene log2FoldChange p value

**CCR5Teff vs. Treg**

Gene log2FoldChange p value

|            |       |          |
|------------|-------|----------|
| Irak3      | -1.58 | 0.00011  |
| Tmem38b    | 1.39  | 1.00E-04 |
| Ahcy12     | -1.55 | 0.00012  |
| Dgat2      | -1.79 | 0.00014  |
| Enpp2      | 2.1   | 0.00014  |
| Ptpa       | 1.25  | 0.00014  |
| Efhd2      | 1.36  | 0.00015  |
| Pkib       | 2.1   | 0.00016  |
| Mboat1     | 1.39  | 0.00016  |
| Sp6        | -1.55 | 0.00016  |
| Dnase1l3   | 1.92  | 0.00017  |
| Gtf2i      | 1.14  | 0.00018  |
| A530064D06 | 2.16  | 0.00019  |
| 2810474O19 | -1.32 | 0.00019  |
| Snord35b   | 1.56  | 0.00019  |
| Asb2       | 1.39  | 0.00019  |
| Grn        | 1.38  | 0.00019  |
| St3gal6    | 1.67  | 2.00E-04 |
| Crtam      | 1.76  | 0.00025  |
| Syne2      | 1.37  | 0.00025  |
| Apoc4      | 2.11  | 0.00026  |
| Gbp2       | -1.29 | 0.00026  |
| Penk       | -1.34 | 0.00026  |
| Tnfaip8    | 1.08  | 0.00026  |
| Vipr1      | 1.96  | 0.00026  |
| Phlpp1     | -1.67 | 0.00027  |
| Rln3       | -1.71 | 0.00028  |
| S1pr2      | 1.2   | 0.00031  |
| Krt17      | 1.89  | 0.00031  |
| Rcan1      | 1.98  | 0.00034  |
| Itih5      | -1.47 | 0.00034  |
| Gm2663     | 2.01  | 0.00035  |
| H2-Aa      | 1.52  | 0.00036  |
| Slc37a2    | 1.69  | 0.00036  |
| 6330512M04 | 2.03  | 4.00E-04 |
| Plek       | 1.73  | 0.00041  |
| Fcgrt      | 2.06  | 0.00042  |
| Chn2       | 1.45  | 0.00044  |
| Stx11      | 1.16  | 0.00044  |
| Pros1      | -1.61 | 0.00046  |
| Tgfbr3     | 1.61  | 0.00046  |
| Gm4951     | -1.42 | 0.00049  |
| Litaf      | 1.18  | 0.00049  |
| Sytl1      | -1.27 | 0.00049  |
| Cfp        | 1.9   | 0.00051  |
| Gramd1a    | 1.3   | 0.00051  |
| Chchd10    | -1.2  | 0.00053  |
| A130040M12 | 1.68  | 0.00056  |

**CCR5Teff vs. Teff**

Gene log2FoldChange p value

**CCR5Teff vs. Treg**

Gene log2FoldChange p value

|            |       |          |
|------------|-------|----------|
| Cxcr5      | 1.12  | 0.00058  |
| She        | -1.6  | 0.00058  |
| Tbc1d8     | 2.03  | 0.00057  |
| App        | 2.01  | 0.00058  |
| Lclat1     | -1.33 | 6.00E-04 |
| Gm12250    | -1.11 | 0.00065  |
| Ccl4       | 1.64  | 0.00071  |
| Lyz2       | 1.6   | 0.00071  |
| Baiap3     | 1.28  | 0.00074  |
| Cd300a     | 1.98  | 0.00073  |
| Cela1      | 1.84  | 0.00073  |
| Gpr183     | 1.01  | 0.00078  |
| Popdc2     | 1.96  | 0.00077  |
| Apol9b     | -1.64 | 0.00083  |
| Il4        | 1.99  | 0.00082  |
| Acpl2      | 1.51  | 0.00091  |
| Axl        | -1.35 | 0.00095  |
| Ccdc28b    | 1.36  | 0.001    |
| Nab1       | 1.07  | 0.001    |
| Pfn2       | 1.37  | 0.001    |
| Sfpi1      | 1.85  | 0.001    |
| Itgad      | 1.95  | 0.0011   |
| Swap70     | -1.44 | 0.0011   |
| Ilgp1      | -1.07 | 0.0011   |
| Skil       | -1.14 | 0.0011   |
| Il12rb2    | 1.94  | 0.0012   |
| Pgam2      | 1.91  | 0.0012   |
| Socs1      | -1.18 | 0.0012   |
| Tlr7       | -1.31 | 0.0012   |
| Lax1       | 0.94  | 0.0013   |
| Ccnd1      | 1.92  | 0.0013   |
| Cd24a      | 1.93  | 0.0013   |
| Sesn1      | -1.11 | 0.0013   |
| Cebpa      | 1.86  | 0.0013   |
| Glipr2     | -0.99 | 0.0013   |
| Slamf6     | 1.07  | 0.0013   |
| Gm11346    | 1.1   | 0.0015   |
| 5031414D18 | 1.86  | 0.0015   |
| Mef2b      | 1.87  | 0.0015   |
| Klhl4      | 1.91  | 0.0016   |
| Tspan5     | 1.78  | 0.0016   |
| Nod1       | -1.12 | 0.0018   |
| Idh2       | 0.99  | 0.0019   |
| Il1rl1     | -1.86 | 0.0021   |
| Tifab      | 1.87  | 0.0021   |
| Racgap1    | 1.09  | 0.0021   |
| Tmsb10     | -1.12 | 0.0021   |
| Cnot6l     | 1.03  | 0.0022   |

**CCR5Teff vs. Teff**

Gene            log2FoldChange    p value

**CCR5Teff vs. Treg**

Gene            log2FoldChange    p value

|             |       |        |
|-------------|-------|--------|
| Mpa2l       | -0.97 | 0.0021 |
| Adam8       | -1.52 | 0.0022 |
| Dopey2      | 1.22  | 0.0022 |
| Nudcd1      | -1.15 | 0.0022 |
| Ppm1j       | -0.98 | 0.0022 |
| Cdc25b      | 1.06  | 0.0022 |
| Sbk2        | 1.83  | 0.0022 |
| Samhd1      | -1.05 | 0.0023 |
| Sdc4        | -1.32 | 0.0025 |
| Ccl3        | 1.83  | 0.0025 |
| Dapl1       | 1.55  | 0.0025 |
| Entpd1      | -1.23 | 0.0026 |
| BC026585    | -1.57 | 0.0027 |
| Slc9a9      | 1.2   | 0.0028 |
| Ak8         | 1.81  | 0.0028 |
| Bmyc        | -1.34 | 0.0028 |
| Ica1l       | 1.83  | 0.0029 |
| Tns1        | -1.52 | 0.003  |
| B3gnt8      | 1.74  | 0.003  |
| Ptrh1       | 1.49  | 0.0031 |
| Rdx         | -0.88 | 0.0031 |
| Spib        | 1.48  | 0.0032 |
| Suox        | -1.07 | 0.0031 |
| Mtrr        | -1.03 | 0.0032 |
| Anxa3       | 1.79  | 0.0032 |
| H2-Q1       | 1.76  | 0.0032 |
| Mtm1        | -1.2  | 0.0032 |
| Podnl1      | 1.09  | 0.0034 |
| Zswim4      | 1.6   | 0.0034 |
| Frdm6       | -1.23 | 0.0035 |
| 4833442J19F | -1.41 | 0.0038 |
| A330049M08  | -1.37 | 0.004  |
| Ifng        | 1.43  | 0.0042 |
| Irak2       | -0.96 | 0.0044 |
| Lrrc66      | -1.74 | 0.0042 |
| Notch2      | -1.3  | 0.0043 |
| Smc4        | -0.87 | 0.0042 |
| Sykb        | 1.58  | 0.0042 |
| Tgif1       | -0.98 | 0.0042 |
| Chd7        | 1.24  | 0.0045 |
| Cybasc3     | 1.26  | 0.0047 |
| Gfpt2       | -1.77 | 0.0047 |
| Gm10406     | -1.55 | 0.0046 |
| Snx13       | -1.05 | 0.0047 |
| Zfp36l1     | -1.13 | 0.0046 |
| C1qtnf6     | -1.76 | 0.0048 |
| Cdca7       | -1.05 | 0.0049 |
| Ly6a        | 0.93  | 0.0049 |

**CCR5Teff vs. Teff****Gene log2FoldChange p value****CCR5Teff vs. Treg****Gene log2FoldChange p value**

|            |       |        |
|------------|-------|--------|
| Slc1a4     | 1.76  | 0.005  |
| Kirrel3    | 1.75  | 0.0051 |
| Arglu1     | -1.21 | 0.0054 |
| Casp4      | 1.02  | 0.0054 |
| Grtp1      | 1.74  | 0.0054 |
| Hopx       | -1.44 | 0.0054 |
| Pak6       | 1.71  | 0.0056 |
| Vdr        | 1.73  | 0.0054 |
| Bcl11a     | 1.6   | 0.0056 |
| Npepl1     | 1.09  | 0.0057 |
| Il1rl2     | 1.63  | 0.006  |
| Ly6d       | 1.47  | 0.0061 |
| Ppm1l      | -1.55 | 0.006  |
| Rnd3       | 1.71  | 0.0059 |
| Aldh3b1    | 1.72  | 0.0065 |
| Cdh5       | 1.69  | 0.0064 |
| Tgfbr1     | -1.02 | 0.0064 |
| Sgk1       | 1.45  | 0.0068 |
| AF251705   | 1.67  | 0.0069 |
| Irf8       | 1.03  | 0.007  |
| Ncoa7      | -0.99 | 0.0069 |
| Chad       | -1.67 | 0.0073 |
| Reep1      | 1.7   | 0.0073 |
| Rpia       | 1.7   | 0.0073 |
| Trp53i11   | -0.87 | 0.0073 |
| Tspan2     | 1.7   | 0.0071 |
| Cd22       | 1.06  | 0.0075 |
| Gpr137b    | 1.66  | 0.008  |
| H2-Eb1     | 1.21  | 0.0079 |
| A830080D01 | -1    | 0.008  |
| Afp        | 1.38  | 0.008  |
| Sirpa      | 1.67  | 0.008  |
| Gas7       | 1.63  | 0.0087 |
| Mfge8      | 1.1   | 0.0087 |
| Atp2a1     | 1.67  | 0.0091 |
| Jun        | -1.36 | 0.0089 |
| Ubqln4     | -1.08 | 0.0089 |
| H2-Ab1     | 1.43  | 0.0096 |
| Il9r       | 1.34  | 0.0096 |
| Optn       | 1.55  | 0.01   |
| Abcb1a     | -0.92 | 0.011  |
| Akap12     | 1.22  | 0.011  |
| 1700019D03 | 1.44  | 0.011  |
| Lgals3     | 1.33  | 0.011  |
| Fam20a     | 1.62  | 0.012  |
| Paqr7      | 1.24  | 0.011  |
| Cnksr3     | -1.49 | 0.012  |
| Shmt1      | -1.06 | 0.012  |

**CCR5Teff vs. Teff**

| Gene | log2FoldChange | p value |
|------|----------------|---------|
|------|----------------|---------|

**CCR5Teff vs. Treg**

| Gene | log2FoldChange | p value |
|------|----------------|---------|
|------|----------------|---------|

|            |       |       |
|------------|-------|-------|
| Hspa2      | 1.59  | 0.012 |
| Lsm7       | -0.94 | 0.012 |
| Lyz1       | 1.31  | 0.013 |
| Stk11      | 1.25  | 0.013 |
| Dusp6      | 1.02  | 0.013 |
| Fam43a     | 1.41  | 0.013 |
| Nkg7       | 1.27  | 0.014 |
| Arhgap18   | -0.92 | 0.014 |
| Heyl       | 1.55  | 0.014 |
| Tmem136    | -1.49 | 0.014 |
| Plaur      | 1.42  | 0.014 |
| Abi3bp     | -1.56 | 0.014 |
| Amigo2     | 1.61  | 0.014 |
| Hras1      | 1.6   | 0.015 |
| 1700001O22 | 1.54  | 0.015 |
| Gzmm       | 1.61  | 0.015 |
| Mcat       | 1.38  | 0.015 |
| Ebi3       | -1.11 | 0.015 |
| Pcsk4      | -1.39 | 0.015 |
| Vill       | -1.19 | 0.016 |
| Lag3       | 0.94  | 0.016 |
| Exoc4      | 0.91  | 0.016 |
| Rara       | -0.94 | 0.017 |
| Fam169b    | -0.75 | 0.017 |
| Galnt2     | 1.3   | 0.018 |
| Igtp       | -0.91 | 0.018 |
| Napsa      | 1.4   | 0.018 |
| Snn        | 1.41  | 0.018 |
| Siah1a     | 1.44  | 0.019 |
| Adam11     | 1.5   | 0.019 |
| Dmd        | -1.52 | 0.019 |
| H2-DMb1    | 1.36  | 0.019 |
| Rnf125     | 1.03  | 0.019 |
| Itgax      | 1.56  | 0.019 |
| Kcnip2     | -1.38 | 0.019 |
| Ly86       | 1.38  | 0.019 |
| Ampd1      | 1.52  | 0.019 |
| Adh1       | 1.2   | 0.019 |
| Egln3      | 1.25  | 0.02  |
| Stat1      | -0.94 | 0.02  |
| Traf3ip2   | 0.82  | 0.02  |
| Wdr82      | -0.97 | 0.02  |
| Msra       | 0.87  | 0.02  |
| Ndr4       | 1.56  | 0.02  |
| Pim1       | -1.23 | 0.02  |
| Wdr26      | 0.9   | 0.021 |
| Arrdc4     | -1.26 | 0.022 |
| Spin2      | -1.14 | 0.022 |

**CCR5Teff vs. Teff**

Gene      log2FoldChange   p value

**CCR5Teff vs. Treg**

Gene      log2FoldChange   p value

|             |       |       |
|-------------|-------|-------|
| Stx1a       | -1.16 | 0.022 |
| Eepd1       | 1.51  | 0.022 |
| Fads3       | 1.5   | 0.022 |
| Psap        | 0.8   | 0.022 |
| Scamp1      | -1.52 | 0.022 |
| Cd5l        | 1.53  | 0.023 |
| Fasl        | 1.14  | 0.023 |
| Tnfrsf9     | -0.96 | 0.023 |
| Gpr155      | 0.97  | 0.023 |
| Rasgrf1     | 1.5   | 0.023 |
| Ramp3       | 1.18  | 0.024 |
| Dusp4       | -1.19 | 0.024 |
| Zeb2        | 1.52  | 0.024 |
| Gna13       | 1.1   | 0.025 |
| Il3ra       | -1.08 | 0.025 |
| Mctp1       | -1.19 | 0.025 |
| Cxcr3       | 0.87  | 0.026 |
| Plcg2       | 1.27  | 0.026 |
| Tmem221     | 1.48  | 0.026 |
| Gna14       | 1.31  | 0.026 |
| Lysmd2      | -1.28 | 0.026 |
| Stt3b       | 1.16  | 0.026 |
| 2310004I24R | 0.91  | 0.027 |
| Acsbg1      | -1.12 | 0.026 |
| Cbfa2t3     | 1.5   | 0.027 |
| Ptpro       | 1.43  | 0.027 |
| 2010001M09  | 1.41  | 0.029 |
| Ccr6        | -1.35 | 0.028 |
| Ccr12       | -0.99 | 0.028 |
| Dok2        | -0.87 | 0.027 |
| Lrba        | 1.34  | 0.028 |
| Pole2       | 1.17  | 0.028 |
| Rad51c      | 1.5   | 0.028 |
| Rnf145      | 0.87  | 0.028 |
| Slamf7      | 1.11  | 0.028 |
| Tsc22d1     | 1.18  | 0.028 |
| Acadsb      | -0.89 | 0.031 |
| Ifnar1      | -0.76 | 0.031 |
| Klk1b27     | 1.49  | 0.03  |
| Lef1        | 0.9   | 0.03  |
| Mfsd6       | 1.42  | 0.03  |
| Pip5k1b     | -1.48 | 0.031 |
| Pipox       | 1.48  | 0.031 |
| Pla2g2d     | 1.36  | 0.03  |
| Prf1        | 0.94  | 0.029 |
| Tmem149     | -0.86 | 0.031 |
| 2210010C17I | -0.78 | 0.033 |
| I830077J02R | 1.47  | 0.033 |

**CCR5Teff vs. Teff**

Gene      log2FoldChange   p value

**CCR5Teff vs. Treg**

Gene      log2FoldChange   p value

|             |         |       |
|-------------|---------|-------|
| Klrd1       | 1.47    | 0.031 |
| Nmral1      | 1.21    | 0.033 |
| 2310015A10  | -1.02   | 0.034 |
| Ccdc120     | 1.44    | 0.034 |
| Fads2       | 1.39 NA |       |
| Fyn         | 0.92    | 0.035 |
| N6amt2      | -0.89   | 0.034 |
| Nacc2       | 1.41    | 0.034 |
| Bcl6        | 1.12    | 0.037 |
| Gbp4        | -0.82   | 0.037 |
| Il4ra       | -0.99   | 0.037 |
| Mmp9        | -1.46   | 0.035 |
| Plscr4      | 1.46    | 0.036 |
| Rgmb        | 1.44    | 0.036 |
| Ryr1        | 1.4     | 0.037 |
| Stk32c      | 1.39    | 0.037 |
| Tnfrsf18    | -0.93   | 0.037 |
| Fbln2       | -1.41   | 0.037 |
| Mgst2       | -0.96   | 0.039 |
| Mthfd1      | -0.81   | 0.038 |
| Rps6kl1     | 1.44    | 0.038 |
| Src         | -1.45   | 0.038 |
| Camkk1      | -1.12   | 0.04  |
| Casp1       | 0.79    | 0.04  |
| Cyp39a1     | 1.44    | 0.039 |
| Phxr4       | 1.44    | 0.04  |
| Sh3bp5      | -0.79   | 0.04  |
| X99384      | 1.36    | 0.039 |
| Abat        | -1.43   | 0.042 |
| AI480653    | -1.09   | 0.042 |
| Ccnb1       | 1.05    | 0.041 |
| Cyp2s1      | 1.31    | 0.042 |
| Obecn       | 1.37    | 0.041 |
| Rbpj        | -0.9    | 0.042 |
| Tdpoz4      | -1.41   | 0.042 |
| 4930524L23F | -1.42   | 0.044 |
| Atp8b4      | 1.35    | 0.044 |
| Kif22       | 1.15    | 0.044 |
| Nvl         | -0.79   | 0.043 |
| Zfml        | -1.01   | 0.043 |
| Abcb9       | 0.74    | 0.045 |
| Slc20a1     | 0.9     | 0.045 |
| Tbx21       | 1.01    | 0.045 |
| Tnks        | 1.2     | 0.044 |
| Btla        | 0.8     | 0.047 |
| Car5b       | 1.37    | 0.047 |
| Gm14446     | -0.75   | 0.048 |
| Kit         | -1.32   | 0.047 |



**CCR5Teff vs. Teff**

| Gene | log2FoldChange | p value |
|------|----------------|---------|
|------|----------------|---------|

**CCR5Teff vs. Treg**

| Gene | log2FoldChange | p value |
|------|----------------|---------|
|------|----------------|---------|

|         |       |       |
|---------|-------|-------|
| Rasip1  | -1.36 | 0.047 |
| Slc35f2 | -1.01 | 0.048 |
| Capg    | -1.02 | 0.049 |
| Magi1   | -1.31 | 0.049 |
| Stc2    | 1.37  | 0.048 |
| Trak1   | 1.15  | 0.049 |
| Unc93b1 | 0.97  | 0.049 |
| Zadh2   | 1.08  | 0.049 |
| Zbtb32  | 1.02  | 0.048 |
| Zdhhc20 | -0.67 | 0.049 |
